# Supplementary material
Source: publisher figshare collection journal article supplement (https://tandf.figshare.com/articles/dataset/_/3978894)

**Supplementary Figure 2. Evaluation of hematological parameters in irradiated minipigs receiving control Lactated Ringer's (LR), local or intravenous injections of freshly isolated ADRCs.** Animals were exposed to total body irradiation with a single 1.2 Gy dose of X-rays using a linear accelerator (LINAC) at 0.6 Gy/min. Blood cell loss and recovery were evaluated. (A) White Blood Cells, (B) lymphocytes, (C) neutrophils, (D) platelets, (E) Red Blood Cells and (F) hematocrit. n=4-6/group; Results are presented as mean  $\pm$  standard error of mean (SEM).

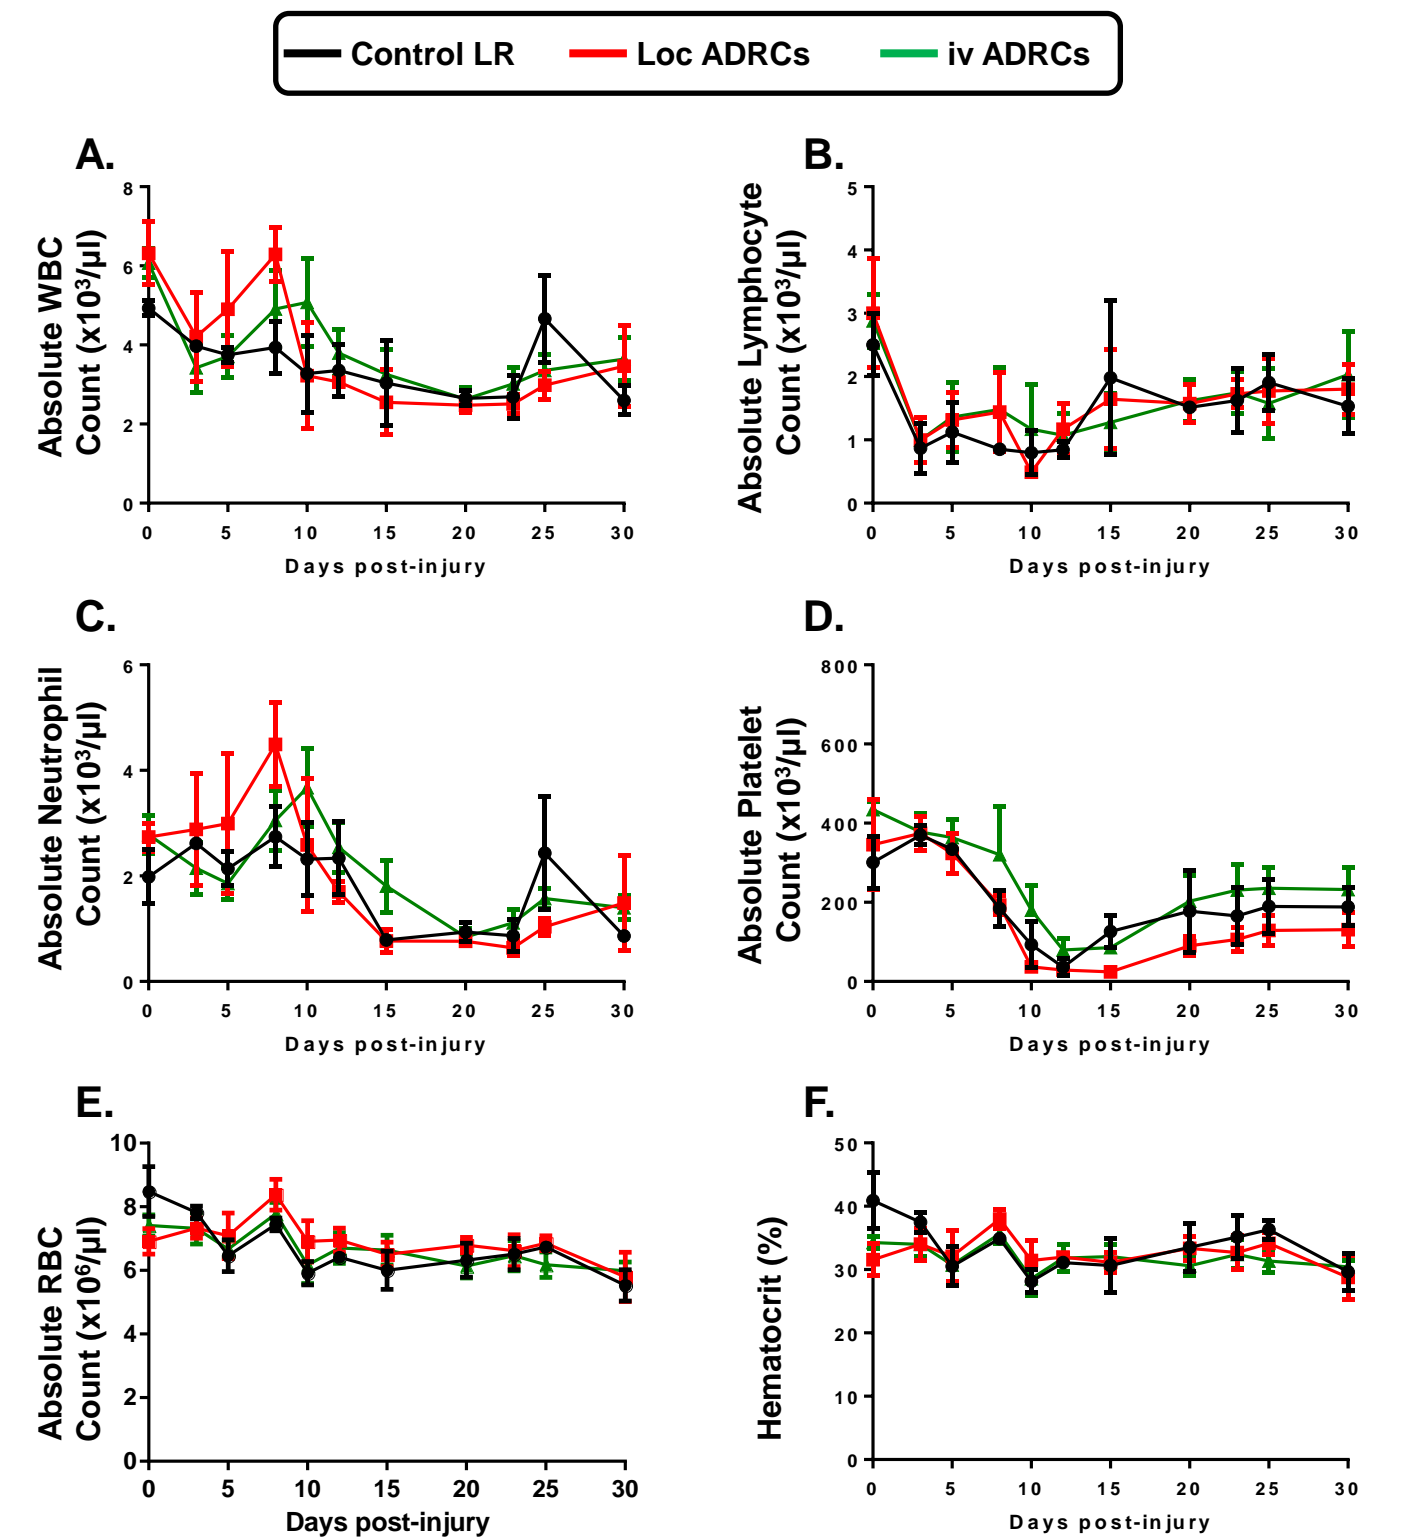

Supplement: Supplementary file 1 [file 2]
