# Supplementary material
Source: publisher figshare collection journal article supplement (https://tandf.figshare.com/articles/dataset/_/3978894)
Supplement: Supplementary file 2 [file 2]

**Supplementary Figure 1. Circulating C - reactive protein (CRP) after burn injury alone and combined injury (radiation and burn).** Serum was assayed for circulating CRP using a porcine-specific ELISA kit. Data are shown as mean CRP in  $\mu\text{g/ml} \pm \text{SEM}$  at 0, 2, 7, 14, 21 and 28 days post-injury.  $n = 4$  animal per group. \*\*\* $p < 0.001$  versus burn; ns: non-significant.

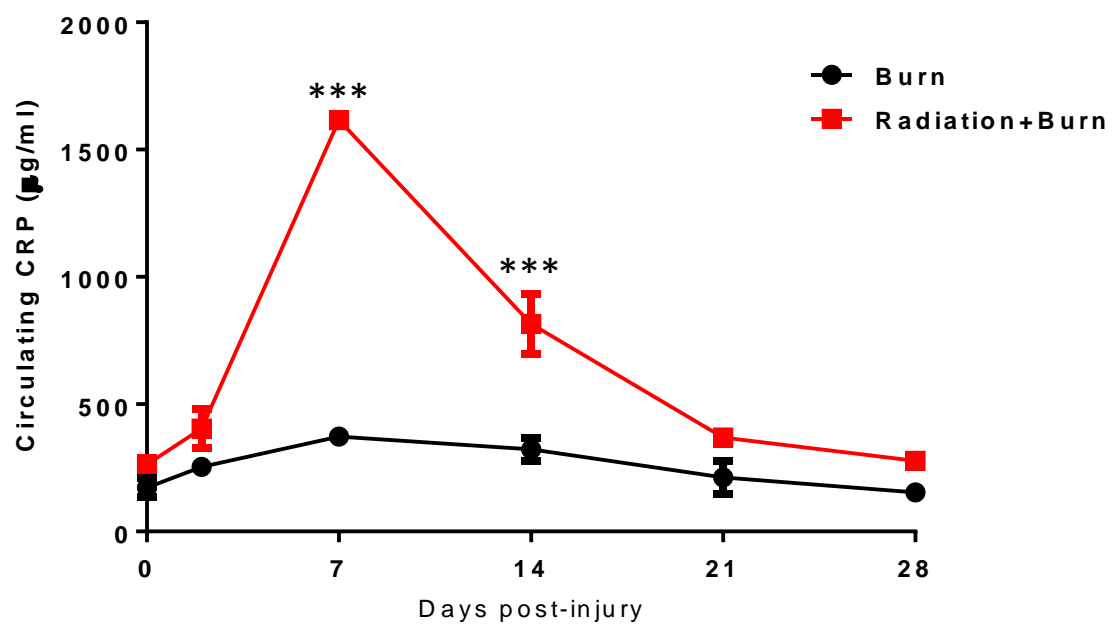

| Day post-injury | Burn         | Radiation + Burn | P-value |
|-----------------|--------------|------------------|---------|
| 0               | 173 $\pm$ 37 | 263 $\pm$ 26     | ns      |
| 2               | 253 $\pm$ 29 | 403 $\pm$ 75     | ns      |
| 7               | 373 $\pm$ 27 | 1616 $\pm$ 24    | ***     |
| 14              | 323 $\pm$ 45 | 815 $\pm$ 117    | ***     |
| 21              | 212 $\pm$ 63 | 368 $\pm$ 17     | ns      |
| 28              | 153 $\pm$ 29 | 277 $\pm$ 22     | ns      |
