# Supplementary material
Source: publisher figshare collection journal article supplement (https://tandf.figshare.com/articles/dataset/_/3978894)

**Supplementary Figure 3. . Histological changes in irradiated minipigs receiving control Lactated Ringer's (LR), local or intravenous (iv) injections of freshly isolated ADRCs.** Skin biopsies collected from animals receiving LR or ADRCs (local or iv) were stained with H&E. Representative photomicrographs of sections stained with H&E at day 7, 14, 21 and 28 post-injury are shown. Arrows show areas of wound epithelialization. n=4-6/group.

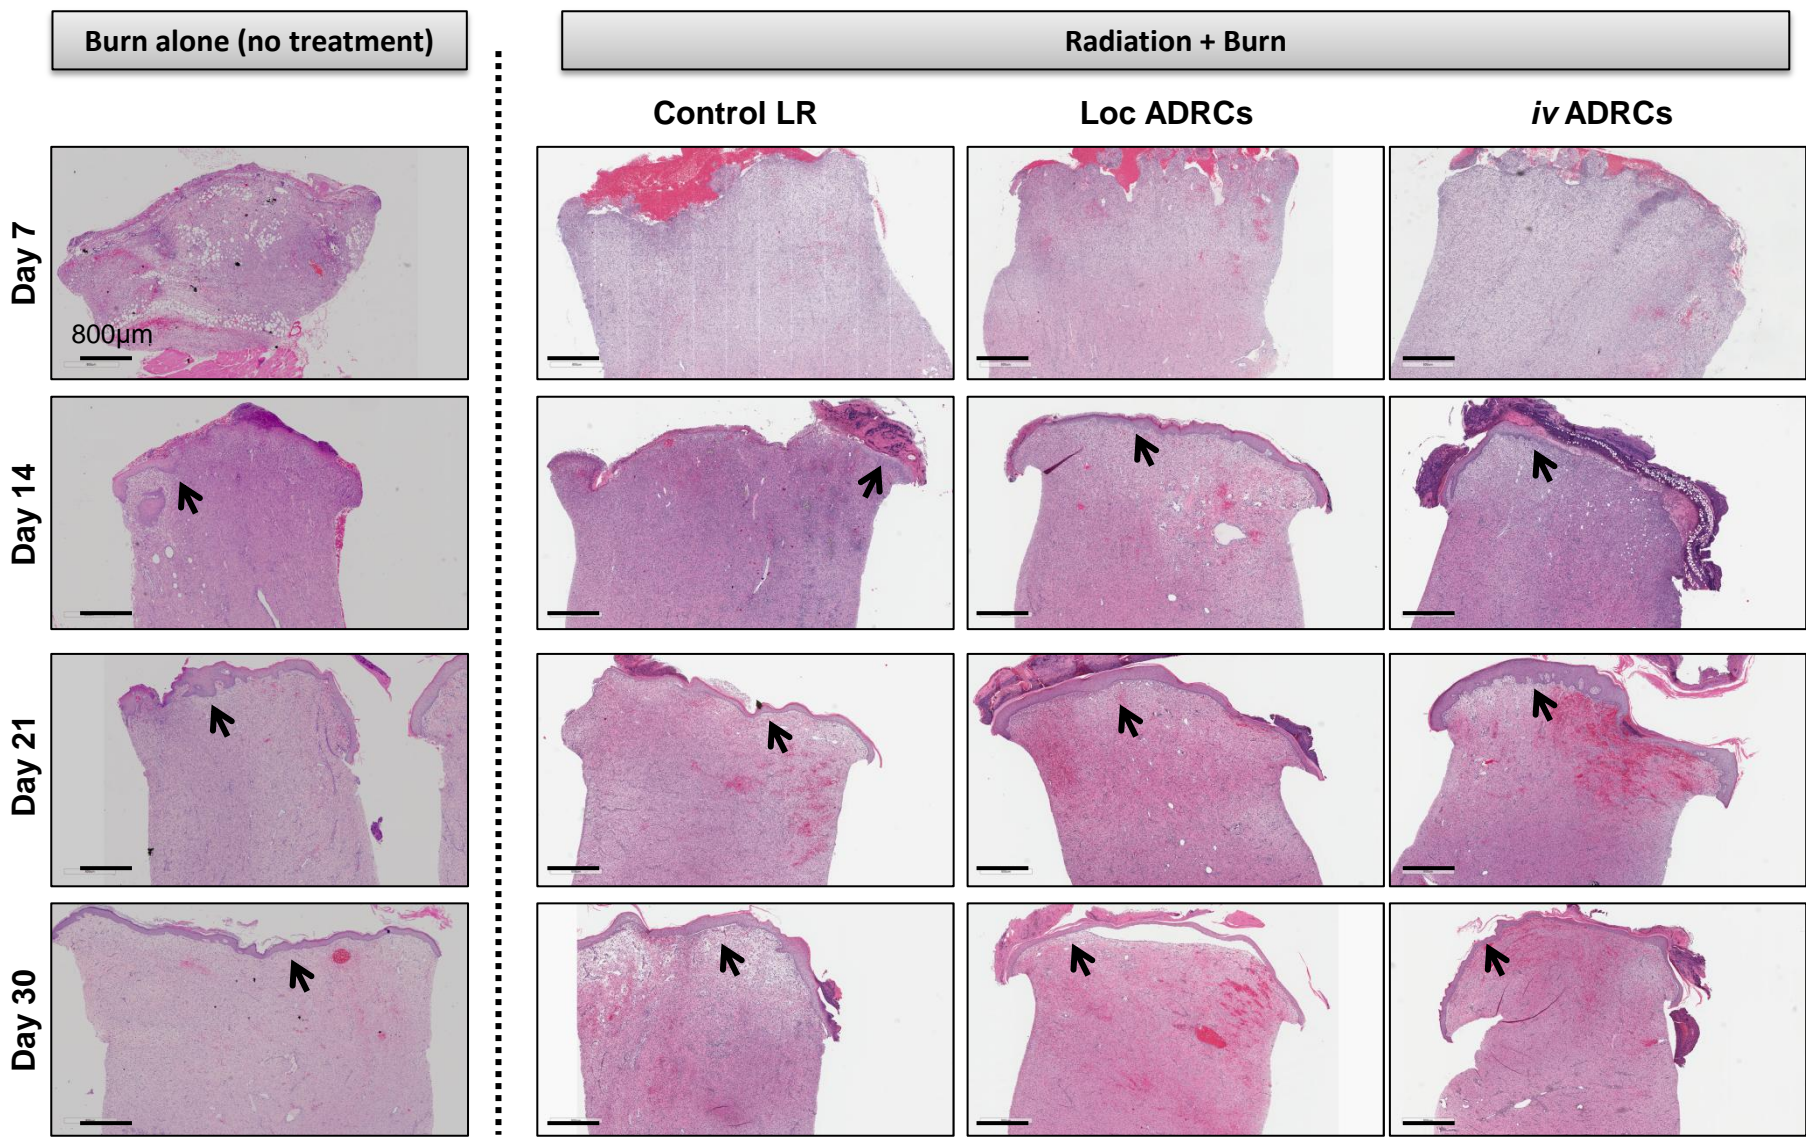

Supplement: Supplementary file 3 [file 2]
